# Supplementary material for: Zn(ii)2,9-dimethyl-1,10-phenanthroline stimulates cultured bovine aortic endothelial cell proliferation
Source: Royal Society of Chemistry journal article supplement (doi:10.1039/d0ra06731h), 2020-01-01
Supplement: d0ra06731h1.pdf [file d0ra06731h1.pdf]

Table S1. Elemental analysis of metal complexes used in this study

| Complex | Calcd<br>C : H : N   | Found<br>C : H : N   | Mach<br>(%) | Complex | Calcd<br>C : H : N             | Found<br>C : H : N   | Mach<br>(%) |
|---------|----------------------|----------------------|-------------|---------|--------------------------------|----------------------|-------------|
| Zn-1    | 15.74 : 4.84 : 6.12  | 15.51 : 4.84 : 6.03  | 98.19       | Zn-21   | 41.07 : 2.01 : 7.98            | 40.83 : 2.30 : 7.84  | 95.02       |
| Zn-2    | 35.18 : 4.92 : 20.51 | 34.90 : 4.68 : 20.43 | 97.97       | Zn-22   | 44.56 : 4.22 : 11.99           | 44.64 : 4.13 : 12.03 | 99.12       |
| Zn-3    | 29.39 : 3.21 : 6.86  | 29.18 : 3.07 : 6.73  | 97.67       | Zn-23   | 39.07 : 2.93 : 19.53           | 38.76 : 3.08 : 19.81 | 97.64       |
| Zn-4    | 22.50 : 3.78 : 13.12 | 21.90 : 3.72 : 12.86 | 97.74       | Zn-24   | 40.78 : 3.41 : 9.51            | 40.56 : 3.61 : 9.34  | 97.38       |
| Zn-5    | 44.40 : 3.42 : 0     | 44.30 : 3.66 : 0     | 96.61       | Zn-25   | 64.28 : 3.32 : 5.77            | 64.23 : 3.36 : 5.73  | 99.35       |
| Zn-6    | 43.08 : 3.46 : 4.19  | 43.00 : 3.69 : 4.12  | 97.30       | Zn-26   | Commercial product (>98%, TCI) |                      |             |
| Zn-7    | 37.75 : 3.52 : 9.78  | 37.50 : 3.48 : 9.68  | 99.06       | Zn-27   | 45.56 : 5.35 : 0               | 45.39 : 4.98 : 0     | 96.36       |
| Zn-8    | 42.95 : 3.90 : 12.52 | 43.05 : 3.73 : 12.54 | 98.42       | Zn-28   | Commercial product (>95%, TCI) |                      |             |
| Zn-9    | 41.06 : 2.76 : 9.58  | 41.12 : 2.96 : 9.55  | 97.59       | Zn-29   | 25.85 : 5.21 : 12.06           | 25.82 : 4.75 : 11.71 | 96.05       |
| Zn-10   | 48.75 : 3.00 : 11.37 | 48.47 : 3.10 : 11.14 | 98.06       | Zn-30   | 21.54 : 7.83 : 25.12           | 21.56 : 7.41 : 24.97 | 97.98       |
| Zn-11   | 45.54 : 2.55 : 8.85  | 45.56 : 2.83 : 8.85  | 96.69       | Zn-31   | Commercial product (>98%, TCI) |                      |             |
| Zn-12   | 48.80 : 3.51 : 8.13  | 48.72 : 3.72 : 8.27  | 97.50       | Zn-32   | Commercial product (>93%, TCI) |                      |             |
| Zn-13   | 47.24 : 3.05 : 8.47  | 47.43 : 3.00 : 8.44  | 99.20       | Mn-DMP  | 50.33 : 3.62 : 8.38            | 50.07 : 3.80 : 7.90  | 96.34       |
| Zn-14   | 51.57 : 4.33 : 7.52  | 51.49 : 4.23 : 7.47  | 98.96       | Fe-DMP  | 48.88 : 3.81 : 8.14            | 49.13 : 4.21 : 7.68  | 94.79       |
| Zn-15   | 41.07 : 2.01 : 7.89  | 40.95 : 2.12 : 7.98  | 97.80       | Co-DMP  | 49.73 : 3.58 : 8.29            | 49.47 : 3.65 : 7.91  | 97.66       |
| Zn-16   | 60.06 : 4.12 : 6.37  | 59.82 : 4.03 : 6.25  | 98.51       | Ni-DMP  | 48.48 : 3.78 : 8.08            | 48.07 : 3.69 : 8.06  | 98.86       |
| Zn-17   | 62.15 : 3.91 : 6.04  | 61.97 : 3.90 : 6.08  | 99.60       | Cu-DMP  | 49.06 : 3.53 : 8.17            | 49.03 : 3.57 : 8.07  | 99.20       |
| Zn-18   | 71.57 : 7.67 : 4.64  | 71.40 : 7.49 : 4.49  | 98.06       | Cd-DMP  | 42.94 : 3.09 : 7.15            | 42.82 : 3.14 : 6.98  | 98.58       |
| Zn-19   | 48.80 : 3.51 : 8.13  | 48.63 : 3.42 : 8.04  | 98.66       | Hg-DMP  | 35.05 : 2.52 : 5.84            | 34.92 : 2.55 : 5.76  | 99.03       |
| Zn-20   | 59.58 : 4.58 : 5.79  | 59.25 : 4.30 : 5.76  | 97.61       | Pb-DMP  | 31.17 : 2.24 : 10.39           | 31.37 : 2.32 : 10.09 | 97.67       |

Table S1
